# Supplementary material
Source: publisher figshare collection journal article supplement (https://karger.figshare.com/ndownloader/files/5930940)
Supplement: Supplementary file 1 [file 5930940]

Supplement

Supplementary table 1: Oligonucleotides used for amplification of 16S rRNA gene.

| Name | Sequence  (5´🡪3´) | Organism and fragment size [bp] | Temperature profile | Reference |
| --- | --- | --- | --- | --- |
| Nadkarni-F | TCCTACGGGAGGCAGCAGT | All bacteria | 95 °C, 10 min  95 °C, 10 s  60 °C, 10 s  72 °C, 25 s  40 cycles | Nadkarni et al. 2002 |
| Nadkarni-R | GGACTACCAGGGTATCTAATCCTGTT |
| Smut16S-81-F | CTTGCACACCGTGTTTTCT | *S. mutans*  519 | 95 °C, 10 min  95 °C, 10 s  55 °C, 10 s  72 °C, 25 s  50 cycles | this work |
| Smut16S-600-R | TTTTACTCCAGACTTTCCTG |
| SD-Lab-158a | GGAAACAGRTGCTAATACCG | *Lactobacilli* (genus)  549 | 95 °C, 10 min  95 °C, 10 s  55 °C, 10 s  72 °C, 25 s  50 cycles | Heilig et al. 2002 |
| SD-Lab-Re | CACCGCTACACATGGAG |
| Bifdent591F | AGCCCATCGCTTAACGGTGGGTC | *B. dentium*  418 | 95 °C, 10 min  95 °C, 10 s  60 °C, 10 s  72 °C, 25 s  50 cycles | Henne et al. 2015 |
| Bifdent1009R | GGCCRTATCTCTACGGC |
| Scar448F | GTGGACTTTATGAATAAGC | *S. wiggsiae*  146 | 95 °C, 10 min  95 °C, 30 s  51 °C, 30 s  72 °C, 30 s  50 cycles | Tanner et al. 2011 |
| Scar619R | CTACCGTTAAGCAGTAAG |
| pF1 (27F) | AGAGTTTGATCCTGGCTCAG | *Fusobacteria* (genus) | 95 °C, 10 min  95 °C, 10 s  60 °C, 10 s  72 °C, 20 s  40 cycles | Edwards et al., 1989  Dix et al., 1990 |
| Fn-1 | GTCATCGTGCACACAGAATTGCTG |

References for Supplementary table 1:

Nadkarni MA, Martin FE, Jacques NA, Hunter N: Determination of bacterial load by real-time PCR using a broad-range (universal) probe and primers set. Microbiology 2002 Jan 1;148:257–266.

Heilig HGHJ, Zoetendal EG, Vaughan EE, Marteau P, Akkermans ADL, Vos WM de: Molecular Diversity of Lactobacillus spp. and Other Lactic Acid Bacteria in the Human Intestine as Determined by Specific Amplification of 16S Ribosomal DNA. Appl Environ Microbiol 2002 Jan 1;68:114–123.

Henne K, Rheinberg A, Melzer-Krick B, Conrads G: Aciduric microbial taxa including Scardovia wiggsiae and Bifidobacterium spp. in caries and caries free subjects. Anaerobe 2015 Oct;35, Part A:60–65.

Tanner ACR, Mathney JMJ, Kent RL, Chalmers NI, Hughes CV, Loo CY, et al.: Cultivable Anaerobic Microbiota of Severe Early Childhood Caries▿. J Clin Microbiol 2011 Apr;49:1464–1474.

Dix K, Watanabe SM, McArdle S, Lee DI, Randolph C, Moncla B, et al.: Species-specific oligodeoxynucleotide probes for the identification of periodontal bacteria. J Clin Microbiol 1990 Jan 2;28:319–323.

Edwards U, Rogall T, Blöcker H, Emde M, Böttger EC: Isolation and direct complete nucleotide determination of entire genes. Characterization of a gene coding for 16S ribosomal RNA. Nucl Acids Res 1989 Nov 10;17:7843–7853.

Supplementary Fig. 1:

Single values of relative metabolic activity for four aciduric caries-associated taxa and asaccharolytic fusobacteria were built for CAC, CAS (A) and CFS (B) plaque sites. Absence of a bar indicates no results for DNA- or RNA-based q-PCR in the respective sample. Among caries-associated bacteria, the relative metabolic activity of lactobacilli increases from CFS<CAS<CAC and exceeds 100% in most caries lesions whereas the fusobacterial activity decreases in the same sequence.
